# Supplementary material
Source: publisher figshare collection journal article supplement (https://acs.figshare.com/ndownloader/files/5692071)
Supplement: Supplementary file 1 [file 5692071]

**High-vacuum pyrolysis of Zr(2,3,7,8,12,13,17,18-octaethylporphyrin)(PhC≡CPh) as a route to novel Zr species: X-ray structure of a hetero-triply bridged species, [(OEP)Zr(μ-Cl)]<sub>2</sub>(μ-O).**

James P. Collman, Roman Boulatov, Geoffrey B. Jameson, Vipin Narang  
Department of Chemistry, Stanford University, Stanford, CA 94305 and Centre for Structural Biology, Institute of Fundamental Sciences, Massey University, Palmerston North (New Zealand).

Supplemental Information.

**Synthesis of [Zr(OEP)(μ-OH)]<sub>2</sub>(μ-O) and [Zr(OEP)(μ-O)]<sub>2</sub>** Formation of these species was previously reported, although <sup>1</sup>H-NMR was given only for the former complex and only in CDCl<sub>3</sub><sup>1</sup>. The hydroxo-bridged dimer was obtained by hydrolysis of Zr(OEP)Cl<sub>2</sub> in a pyridine-CH<sub>2</sub>Cl<sub>2</sub> (1:1) solution, similar to a method used for synthesis of other Zr-O-Zr bridged species. Zr(OEP)Cl<sub>2</sub> (10 mg) was dissolved in anhydrous pyridine (4 mL), diluted with anhydrous CH<sub>2</sub>Cl<sub>2</sub> (4 mL) and exposed to air. After 1 day, the solvents were removed under vacuum, the residue, which mainly contained [Zr(OEP)(μ-OH)]<sub>2</sub>(μ-O) and small amounts of [Zr(OEP)(μ-O)]<sub>2</sub> and Zr(OEP)Cl<sub>2</sub> as judged by <sup>1</sup>H NMR, was treated with C<sub>6</sub>H<sub>6</sub> to remove the last 2 components. The hydroxo-bridged dimer is only sparingly soluble in benzene. <sup>1</sup>H NMR (anhydrous C<sub>6</sub>D<sub>6</sub>): 9.52 (s, 4 H, *meso*-), 3.88 (m, 8 H, CH<sub>2</sub>), 3.75 (m, 8 H, CH<sub>2</sub>), 1.63 (t, 7.5 Hz, 24 H, CH<sub>3</sub>), -6.92 (s, 2 H, μ-OH); the position of the *meso*-protons is greatly affected by the presence of pyridine, which significantly increases solubility of the complex in benzene (δ<sub>meso</sub> = 9.97 ppm if *ca.* 3 eq. pyridine are present) or by H<sub>2</sub>O. These compounds also cause broadening of the μ-OH resonances, but do not change its position. [Zr(OEP)(μ-OH)]<sub>2</sub>(μ-O) converts to [Zr(OEP)(μ-O)]<sub>2</sub> in 30 hours under dynamic vacuum (5 mTorr) at room temperature. This complex is significantly more soluble in benzene, which was used to separate it from unreacted [Zr(OEP)(μ-OH)]<sub>2</sub>(μ-O). <sup>1</sup>H NMR (C<sub>6</sub>D<sub>6</sub>): 9.71 (s, 4 H, *meso*-), 3.83 (m, 8 H, CH<sub>2</sub>), 3.67 (m, 8 H, CH<sub>2</sub>), 1.67 (t, 7 Hz, 24 H, CH<sub>3</sub>). IR (KBr): 696 cm<sup>-1</sup> (Zr-O-Zr) +ESI/MS (pyridine): 1279.6 (cluster, M-H<sup>+</sup>); calcd for C<sub>72</sub>H<sub>89</sub>O<sub>2</sub>Zr<sub>2</sub>: 1279.5 (cluster). The complex reverts to [Zr(OEP)(μ-OH)]<sub>2</sub>(μ-O) in wet solvents.

**X-ray structure determination of [Zr(OEP)(μ-Cl)]<sub>2</sub>(μ-O) (3)** X-ray diffraction data were collected from a very thin plate, leading to a rather weak data set that did not extend beyond 1.05 Å in resolution. Thus, restraints were applied to the anisotropic displacement parameters of all non-carbon atoms in least-squares refinements with SHELXL-97 (DELU 0.01 and ISOR 0.005). See Table S1 details of crystal, data collection and refinement parameters.

**Table S1.** Crystallographic data for [Zr(OEP)(μ-Cl)]<sub>2</sub>(μ-O) (3).

|                         |                                                                                  |
|-------------------------|----------------------------------------------------------------------------------|
| Empirical Formula       | C <sub>72</sub> H <sub>88</sub> Cl <sub>2</sub> N <sub>8</sub> O Zr <sub>2</sub> |
| Formula Weight          | 1334.84                                                                          |
| Crystal Dimensions (mm) | 0.26 x 0.26 x 0.007                                                              |

|                                                                 |                                                                            |
|-----------------------------------------------------------------|----------------------------------------------------------------------------|
| Lattice Parameters                                              | a = 18.836(4) Å                                                            |
|                                                                 | b = 15.084(4) Å                                                            |
|                                                                 | c = 23.170(5) Å                                                            |
|                                                                 | $\alpha = 90^\circ$                                                        |
|                                                                 | $\beta = 100.016(5)^\circ$                                                 |
|                                                                 | $\gamma = 90^\circ$                                                        |
|                                                                 | V = 6483(3) Å <sup>3</sup>                                                 |
| Space Group                                                     | P2 <sub>1</sub> /c (#14)                                                   |
| Z value                                                         | 4                                                                          |
| D <sub>calc</sub>                                               | 1.37 g/cm <sup>3</sup>                                                     |
| R (wR <sub>2</sub> )*                                           | 0.0621 (0.1593)                                                            |
| Goodness of Fit Indicator                                       | 0.712                                                                      |
| Crystal color, habit                                            | Red, very thin plate                                                       |
| Crystal system                                                  | Monoclinic                                                                 |
| Lattice type                                                    | Primitive                                                                  |
| Reflections used for unit cell determination (2 $\theta$ range) | 1261 (3.65° < 2 $\theta$ < 39.6°)                                          |
| F <sub>000</sub>                                                | 2792                                                                       |
| $\mu$ (Mo-K $\alpha$ )                                          | 4.55 cm <sup>-1</sup>                                                      |
| Diffractometer                                                  | Siemens SMART CCD                                                          |
| Radiation                                                       | Mo-K $\alpha$ ( $\lambda = 0.7069$ Å); graphite monochromated              |
| Temperature                                                     | -94 ± 1 °C                                                                 |
| Scan type/slicing                                               | $\omega/0.3^\circ$                                                         |
| 2 $\theta_{\max}$                                               | 39.6°                                                                      |
| Reflections measured                                            | 18203 (total); 6153 (unique, R <sub>int</sub> = 0.088, I > 1 $\sigma$ (I)) |
| Corrections                                                     | Lorentz, polarization, absorption                                          |
| Refinement                                                      | Full-matrix least-square on F <sup>2</sup>                                 |
| Function minimized <sup>†</sup>                                 | $\sum w(F_o^2 - F_c^2)^2$                                                  |
| Anomalous dispersion                                            | all non-hydrogen atoms                                                     |
| Variables/restraints                                            | 763/696                                                                    |
| Reflection/parameter ratio                                      | 7.7                                                                        |
| Max shift/ $\sigma$ in final cycle                              | 0.003                                                                      |

$$* R_1 = \sum ||F_o| - |F_c|| / \sum |F_o|; wR_2 = [ \sum ( w (F_o^2 - F_c^2)^2 ) / \sum w(F_o^2) ]^{1/2}$$

$$^\dagger \text{Weight} = 1/[ \sigma^2(F_o^2) + (0.0576p)^2 ] \text{ where } P = ( \text{Max}(F_o^2, 0) + 2F_c^2 ) / 3$$

#### References:

1. Brand, H.; Arnold, J. *Organometallics* **1993**, *12*, 3655 – 3665.
